# Supplementary material for: Transcriptomic and proteomic signatures of stemness and differentiation in the colon crypt
Source: PubMed Central journal article supplement (PMC7438495; doi:10.1038/s42003-020-01181-z), 2020-08-19
Supplement: 42003_2020_1181_MOESM6_ESM.pdf [file 42003_2020_1181_MOESM6_ESM.pdf]

## Description of Additional Supplementary Files

**File Name: Supplementary Data 1**

**Description:** Global mRNA Gene Expression

**File Name: Supplementary Data 2**

**Description:** Global Protein Expression

**File Name: Supplementary Data 3**

**Description:** Marker Gene Lists (mRNA)

**File Name: Supplementary Data 4**

**Description:** List of Alternatively APA+Spliced Genes
